# Supplementary material
Source: PubMed Central journal article supplement (PMC5294205)
Supplement: 10.1074_M116.061051_mcp.M116.061051-1.pdf [file 10.1074_M116.061051_mcp.M116.061051-1.pdf]

**TABLE S1. Confidence level classification parameters used by BD Biosciences**

| CL | Fold change | Signal Quality <sup>a</sup> | Visual Inspection | # comparisons      |
|----|-------------|-----------------------------|-------------------|--------------------|
| 10 | >2          | Good                        | Pass              | 9 / 9              |
| 9  | 1.5 – 2     | Good                        | Pass              | 9 / 9              |
| 8  | >2          | Low                         | Pass              | 9 / 9              |
| 7  | 1.25 – 1.5  | Good                        | Pass              | 9 / 9              |
| 6  | >2          | Good                        | Fail              | 9 / 9              |
| 5  | 1.5 – 2     | Good                        | Fail              | 9 / 9              |
| 4  | >2          | Low                         | Fail              | 9 / 9              |
| 3  | 1.25 – 1.5  | Good                        | Fail              | 9 / 9              |
| 2  | 1.25 – 2    | Low                         | Fail              | 9 / 9              |
| 1  | >1.5        | Good                        | -                 | 8 / 9 <sup>b</sup> |

<sup>a</sup> Quality of a signal is determined by software.

<sup>b</sup> For one of the 9 comparisons, fold change was less than 1.25

**TABLE S3. Summary of differentially expressed proteins after CADA-treatment, as detected with BD PowerBlot™**

| <b>Down-regulated proteins</b> |                                                                                               |                 |
|--------------------------------|-----------------------------------------------------------------------------------------------|-----------------|
| Uniprot ID                     | Name                                                                                          | CL <sup>a</sup> |
| Q9ULH1                         | Arf-GAP with SH3 domain, ANK repeat and PH domain-containing protein 1 – 148 kDa <sup>b</sup> | 10              |
| Q15283                         | Ras GTPase-activating protein 2                                                               | 10              |
| P63208                         | S-phase kinase-associated protein 1 – 17 kDa                                                  | 10              |
| P42224                         | Signal transducer and activator of transcription 1 – 93 kDa                                   | 10              |
| P35637                         | RNA-binding protein FUS                                                                       | 10              |
| Q13426                         | DNA repair protein XRCC4                                                                      | 10              |
| O43583                         | Density-regulated protein                                                                     | 9               |
| P54687                         | Branched-chain-amino-acid aminotransferase, cytosolic                                         | 9               |
| P05412                         | c-Jun/Transcription factor AP-1                                                               | 9               |
| P29350                         | Tyrosine-protein phosphatase non-receptor type 6                                              | 9               |
| Q06124                         | Tyrosine-protein phosphatase non-receptor type 11                                             | 9               |
| P62491                         | Ras-related protein Rab-11A                                                                   | 9               |
| Q92667                         | A-kinase anchor protein 1, mitochondrial                                                      | 8               |
| Q9ULH1                         | Arf-GAP with SH3 domain, ANK repeat and PH domain-containing protein 1 – 134 kDa              | 8               |
| O14745                         | Na(+)/H(+) exchange regulatory cofactor NHE-RF1                                               | 8               |
| Q9UIV8                         | Serpin B13                                                                                    | 7               |
| Q99523                         | Sortilin/Neurotensin Receptor 3                                                               | 7               |
| P40763                         | Signal transducer and activator of transcription 3                                            | 7               |
| P04083                         | Annexin A1                                                                                    | 6               |
| O43929                         | Origin recognition complex subunit 4                                                          | 6               |
| P11233                         | Ras-related protein Ral-A                                                                     | 6               |
| P29475                         | Nitric oxide synthase, brain                                                                  | 4               |
| Q15596                         | Nuclear receptor coactivator 2                                                                | 4               |
| O60231                         | Putative pre-mRNA-splicing factor ATP-dependent RNA helicase DHX16                            | 3               |
| P30042                         | ES1 protein homolog, mitochondrial                                                            | 3               |
| P06239                         | Tyrosine-protein kinase Lck                                                                   | 3               |
| P51955                         | Serine/threonine-protein kinase Nek2                                                          | 3               |
| Q96D71                         | RalBP1-associated Eps domain-containing protein 1                                             | 3               |
| P53779                         | Mitogen-activated protein kinase 10                                                           | 2               |
| P41743                         | Protein kinase C iota type                                                                    | 2               |
| P62826                         | GTP-binding nuclear protein Ran                                                               | 2               |
| P42224                         | Signal transducer and activator of transcription 1 – 89 kDa                                   | 2               |
| O00267                         | Transcription elongation factor SPT5                                                          | 1               |

TABLE S3 (continued)

| <b>Up-regulated proteins</b> |                                                                          |    |
|------------------------------|--------------------------------------------------------------------------|----|
| Uniprot ID                   | Name                                                                     | CL |
| P30281                       | G1/S-specific cyclin-D3                                                  | 10 |
| Q13501                       | Sequestome-1/p62 lck ligand                                              | 10 |
| Q08999                       | Retinoblastoma-like protein 2                                            | 10 |
| P63208                       | S-phase kinase-associated protein 1 – 20 kDa                             | 9  |
| P12814                       | Alpha-actinin-1                                                          | 7  |
| O15155                       | BET1 homolog                                                             | 7  |
| P06493                       | Cyclin-dependent kinase 1                                                | 7  |
| O75475                       | PC4 and SFRS1-interacting protein                                        | 7  |
| Q9NRZ9                       | Lymphoid-specific helicase                                               | 7  |
| Q16625                       | Occludin                                                                 | 7  |
| Q13596                       | Sorting nexin-1                                                          | 7  |
| P53778                       | Mitogen-activated protein kinase 12                                      | 6  |
| P07339                       | Cathepsin D                                                              | 5  |
| O75912                       | Diacylglycerol kinase iota                                               | 4  |
| O94979                       | Protein transport protein Sec31A                                         | 4  |
| O15379                       | Histone deacetylase 3                                                    | 3  |
| P78344                       | Eukaryotic translation initiation factor 4 gamma 2                       | 3  |
| P19174                       | 1-phosphatidylinositol 4,5-bisphosphate phosphodiesterase gamma-1/PLC-II | 3  |
| Q92854                       | Semaphorin-4D/CD100                                                      | 2  |
| P07099                       | Epoxide hydrolase 1                                                      | 2  |
| P22061                       | Protein-L-isoaspartate(D-aspartate) O-methyltransferase                  | 2  |

<sup>a</sup> Confidence Level: assigned using signal criteria listed in Table S1.

<sup>b</sup> When proteins were detected with multiple bands on the gel, apparent molecular weight is indicated for each band.

**TABLE S4. Signal peptide and signal anchor proteins detected in BD PowerBlot™**

| Uniprot ID | Protein name                                               | Signal <sup>a</sup> |
|------------|------------------------------------------------------------|---------------------|
| O43561     | Linker for activation of T-cells family member 1           | SAS                 |
| P04626     | Receptor tyrosine-protein kinase erbB-2                    | SP                  |
| P05121     | Plasminogen activator inhibitor 1                          | SP                  |
| P05362     | Intercellular adhesion molecule 1                          | SP                  |
| P05556     | Integrin beta-1                                            | SP                  |
| P06396     | Gelsolin                                                   | SP                  |
| P07099     | Epoxide hydrolase 1                                        | SAS                 |
| P07339     | Cathepsin D                                                | SP                  |
| P11021     | 78 kDa glucose-regulated protein                           | SP                  |
| P11279     | Lysosome-associated membrane glycoprotein 1                | SP                  |
| P13667     | Protein disulfide-isomerase A4                             | SP                  |
| P15144     | Aminopeptidase N                                           | SAS                 |
| P17301     | Integrin alpha-2                                           | SP                  |
| P25445     | Tumor necrosis factor receptor superfamily member 6        | SP                  |
| P19634     | Sodium/hydrogen exchanger 1                                | SAS                 |
| P05305     | Endothelin-1 receptor                                      | SP                  |
| P27824     | Calnexin                                                   | SP                  |
| P30411     | B2 bradykinin receptor                                     | SAS                 |
| P32004     | Neural cell adhesion molecule L1                           | SP                  |
| P78324     | Tyrosine-protein phosphatase non-receptor type substrate 1 | SP                  |
| Q04912     | Macrophage-stimulating protein receptor                    | SP                  |
| Q13586     | Stromal interaction molecule 1                             | SP                  |
| Q14118     | Dystroglycan                                               | SP                  |
| Q92854     | Semaphorin-4D                                              | SP                  |
| Q99523     | Sortilin/Neurotensin Receptor 3                            | SP                  |
| P20273     | B-cell receptor CD22                                       | SP                  |
| O43493     | Trans-Golgi network integral membrane protein 2            | SP                  |

<sup>a</sup> SP – Signal peptide; SAS – Signal anchor sequence

FIG. S1

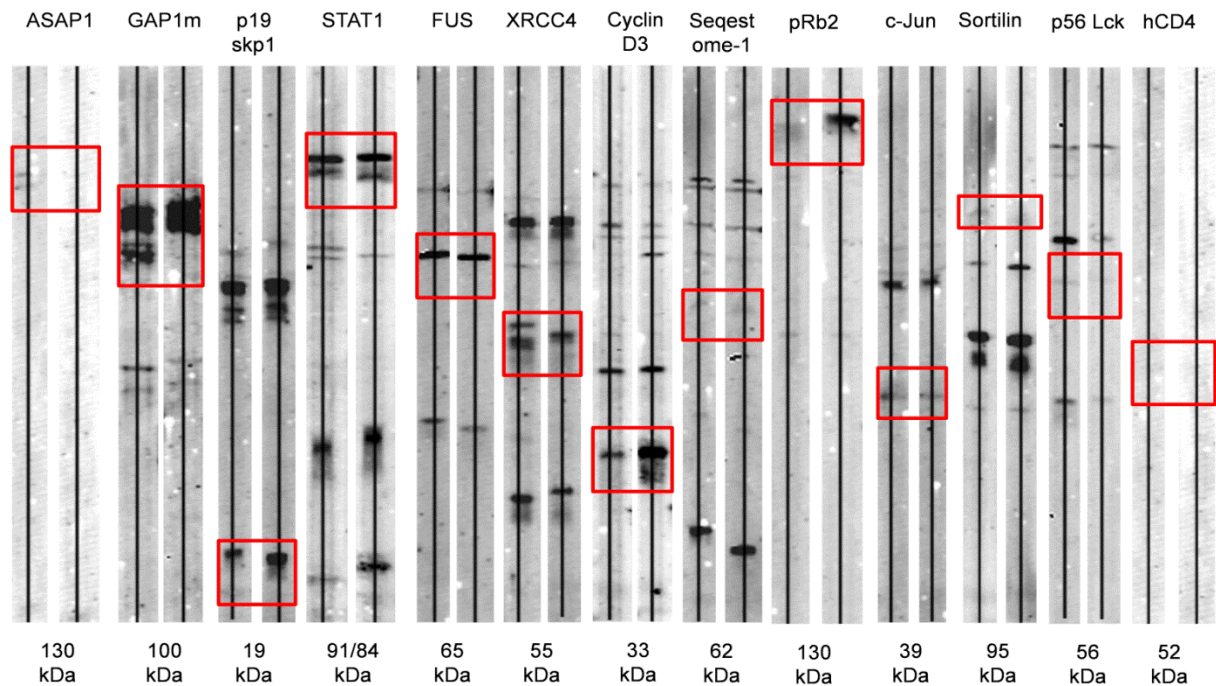

FIG. S1. **BD PowerBlot™ Western Array images of proteins selected for validation.** Detailed image comparison of the proteins from Table 1. In each comparison, left blots represent the DMSO control and right blots the CADA-treated cell lysates. The predicted molecular weight (in kDa) of each protein is given below the blots. Red boxes indicate their expected position on the gel, based on the molecular weight standards of each blot.
